# Supplementary material for: Single-cell transcriptome sequencing allows genetic separation, characterization and identification of individuals in multi-person biological mixtures
Source: PubMed Central journal article supplement (PMC9941516; doi:10.1038/s42003-023-04557-z), 2023-02-20
Supplement: 42003_2023_4557_MOESM1_ESM.pdf [file 42003_2023_4557_MOESM1_ESM.pdf]

**Supplementary figure 1:** The percentage of Y chromosomal reads per cluster compared to the total read count.

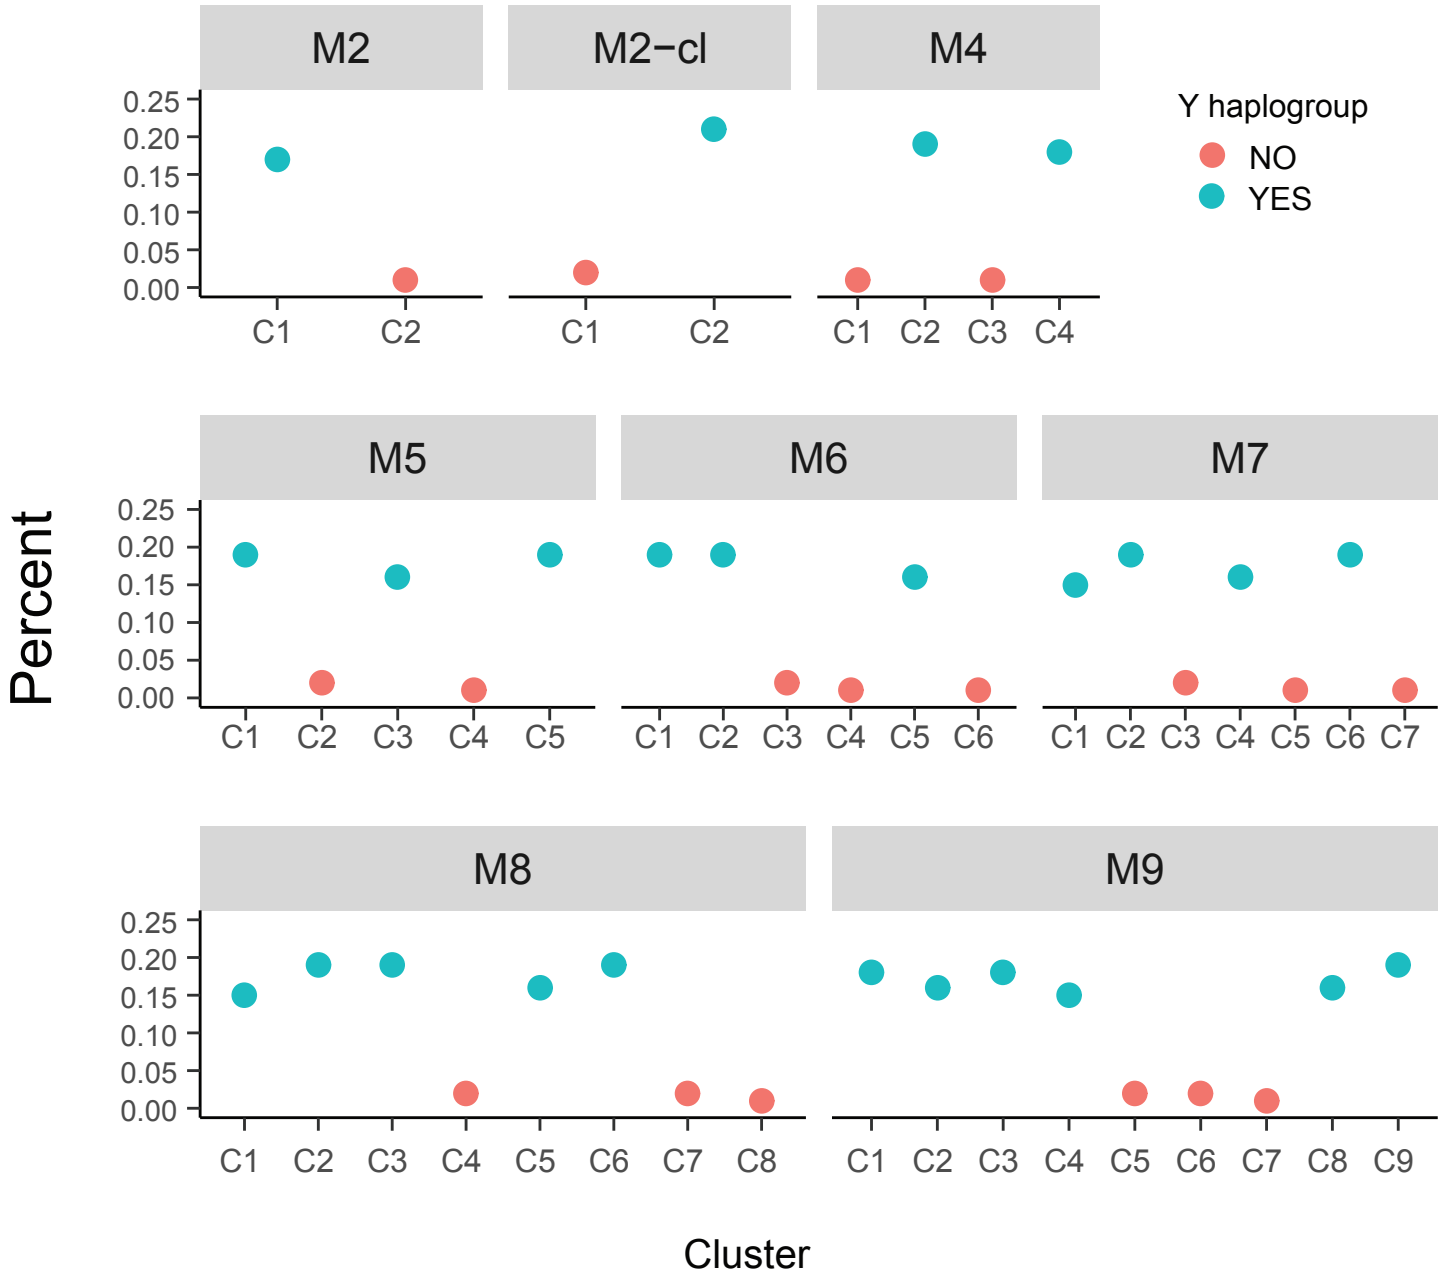

Each panel shows a deconvoluted mixture of different complexity ranging from 2-9 individuals. Higher expression suggest the cluster is male. In addition, colors in the graph indicate the assignment of Y chromosome haplogroup to each cluster.

**Supplementary figure 2:** The percentage of reads in XIST compared to the overall expression over the X chromosome.

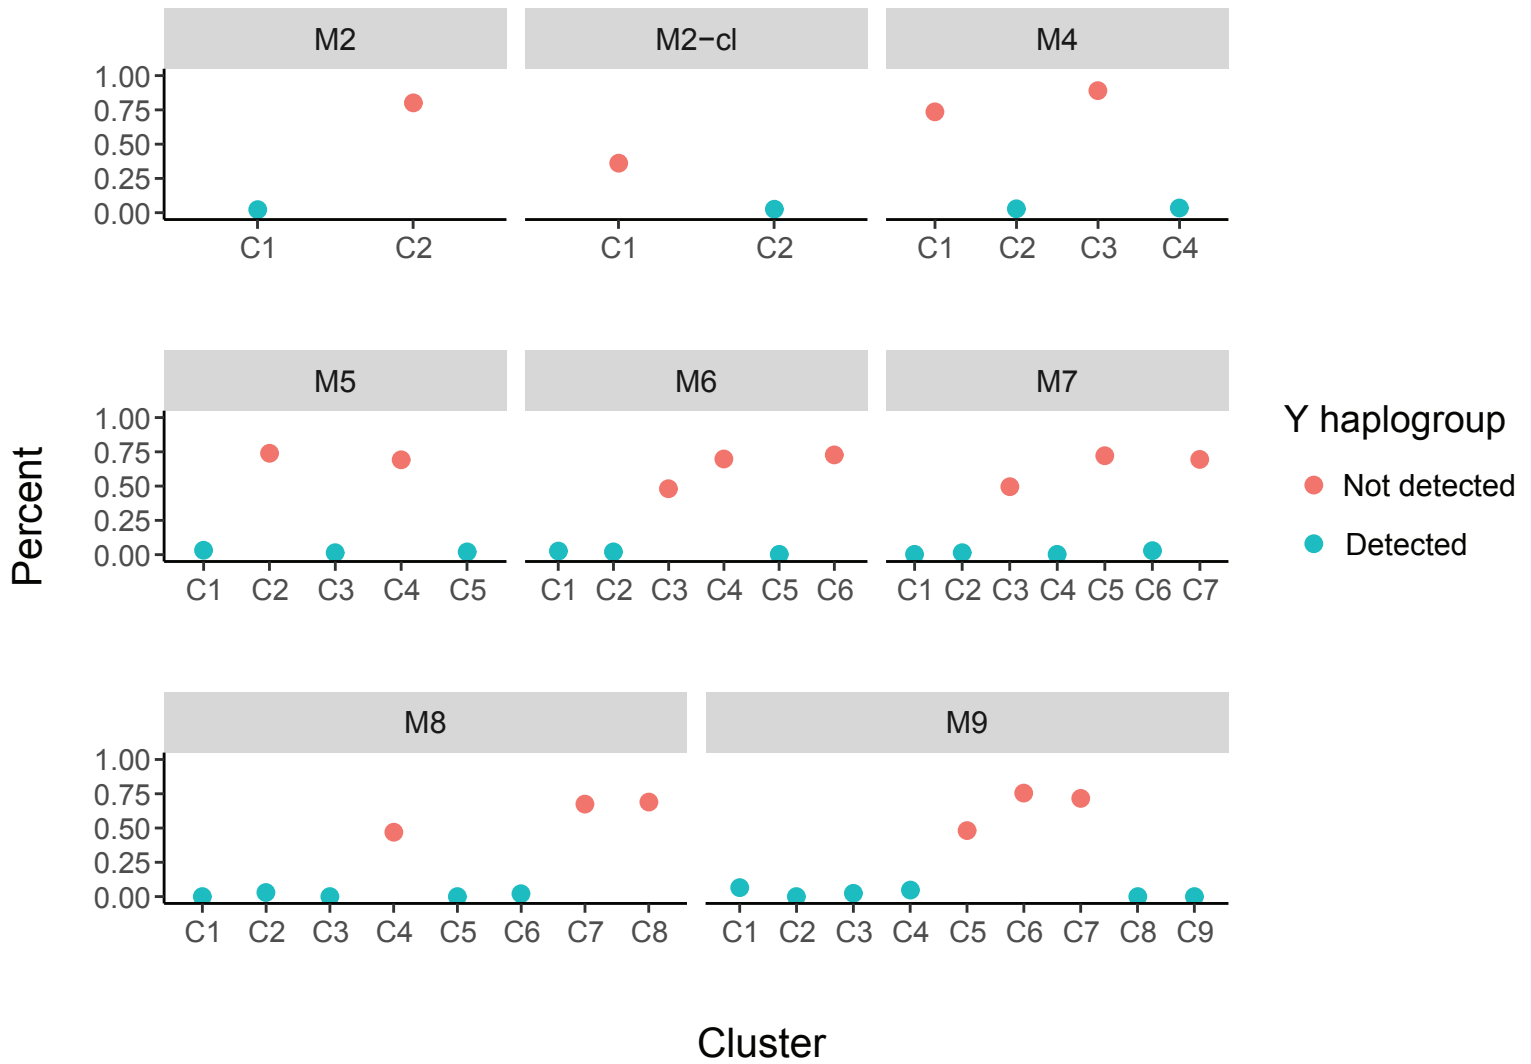

Each panel shows a deconvoluted mixture of different complexity from 2-9 individuals. Higher expression suggest the cluster is female. In addition, colours in the graph indicate the assignment of Y chromosome haplogroup to each cluster.

**Supplementary figure 3: Evaluation of tissue of origin of biological mixtures.**

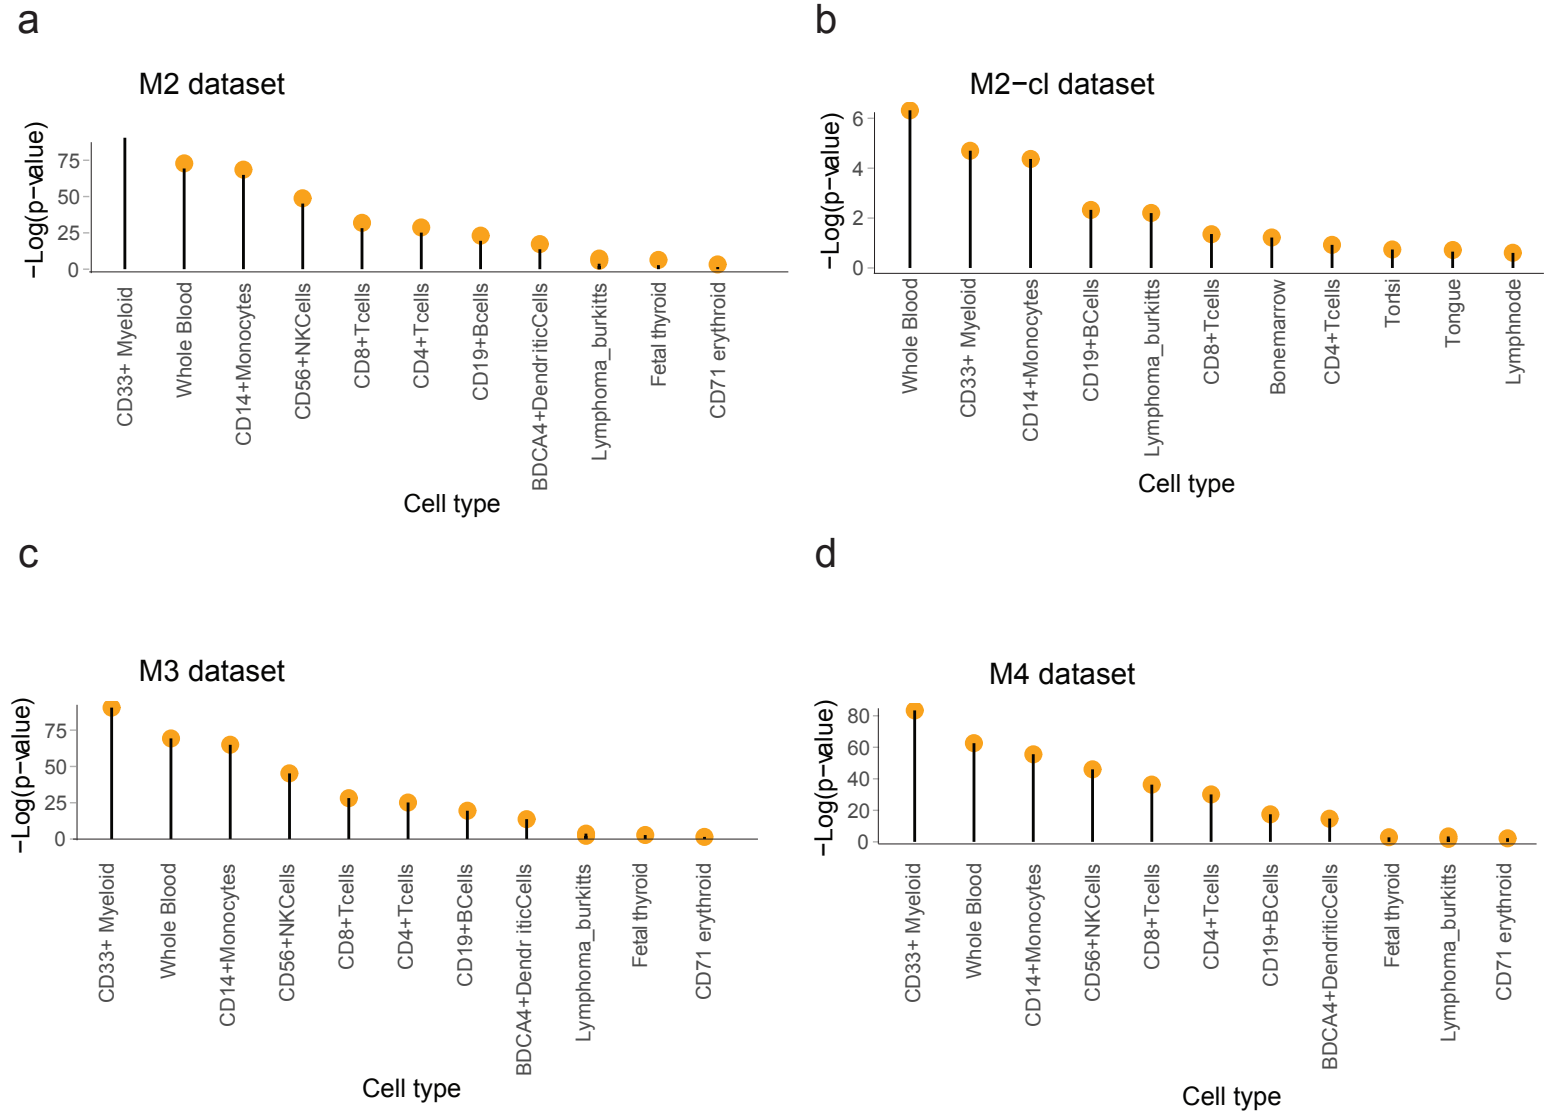

Pools of differentially expressed genes between clusters of t-SNE were assessed by Enricher to investigate the tissue of origin of the mixture. a) For biological mixture of two individuals. b) For biological mixture of 2 individuals with close mitochondrial ancestry. c) For mixture of 3 individuals with European ancestry. d) For mixture of 4 individuals with diverse background. As expected, the analysis indicate the tissue of origin of these mixtures is blood.

**Supplementary figure 4:** Biparental ancestry assessed using STRUCTURE after deconvolution of mixtures (M2-M9) and matching towards the reference

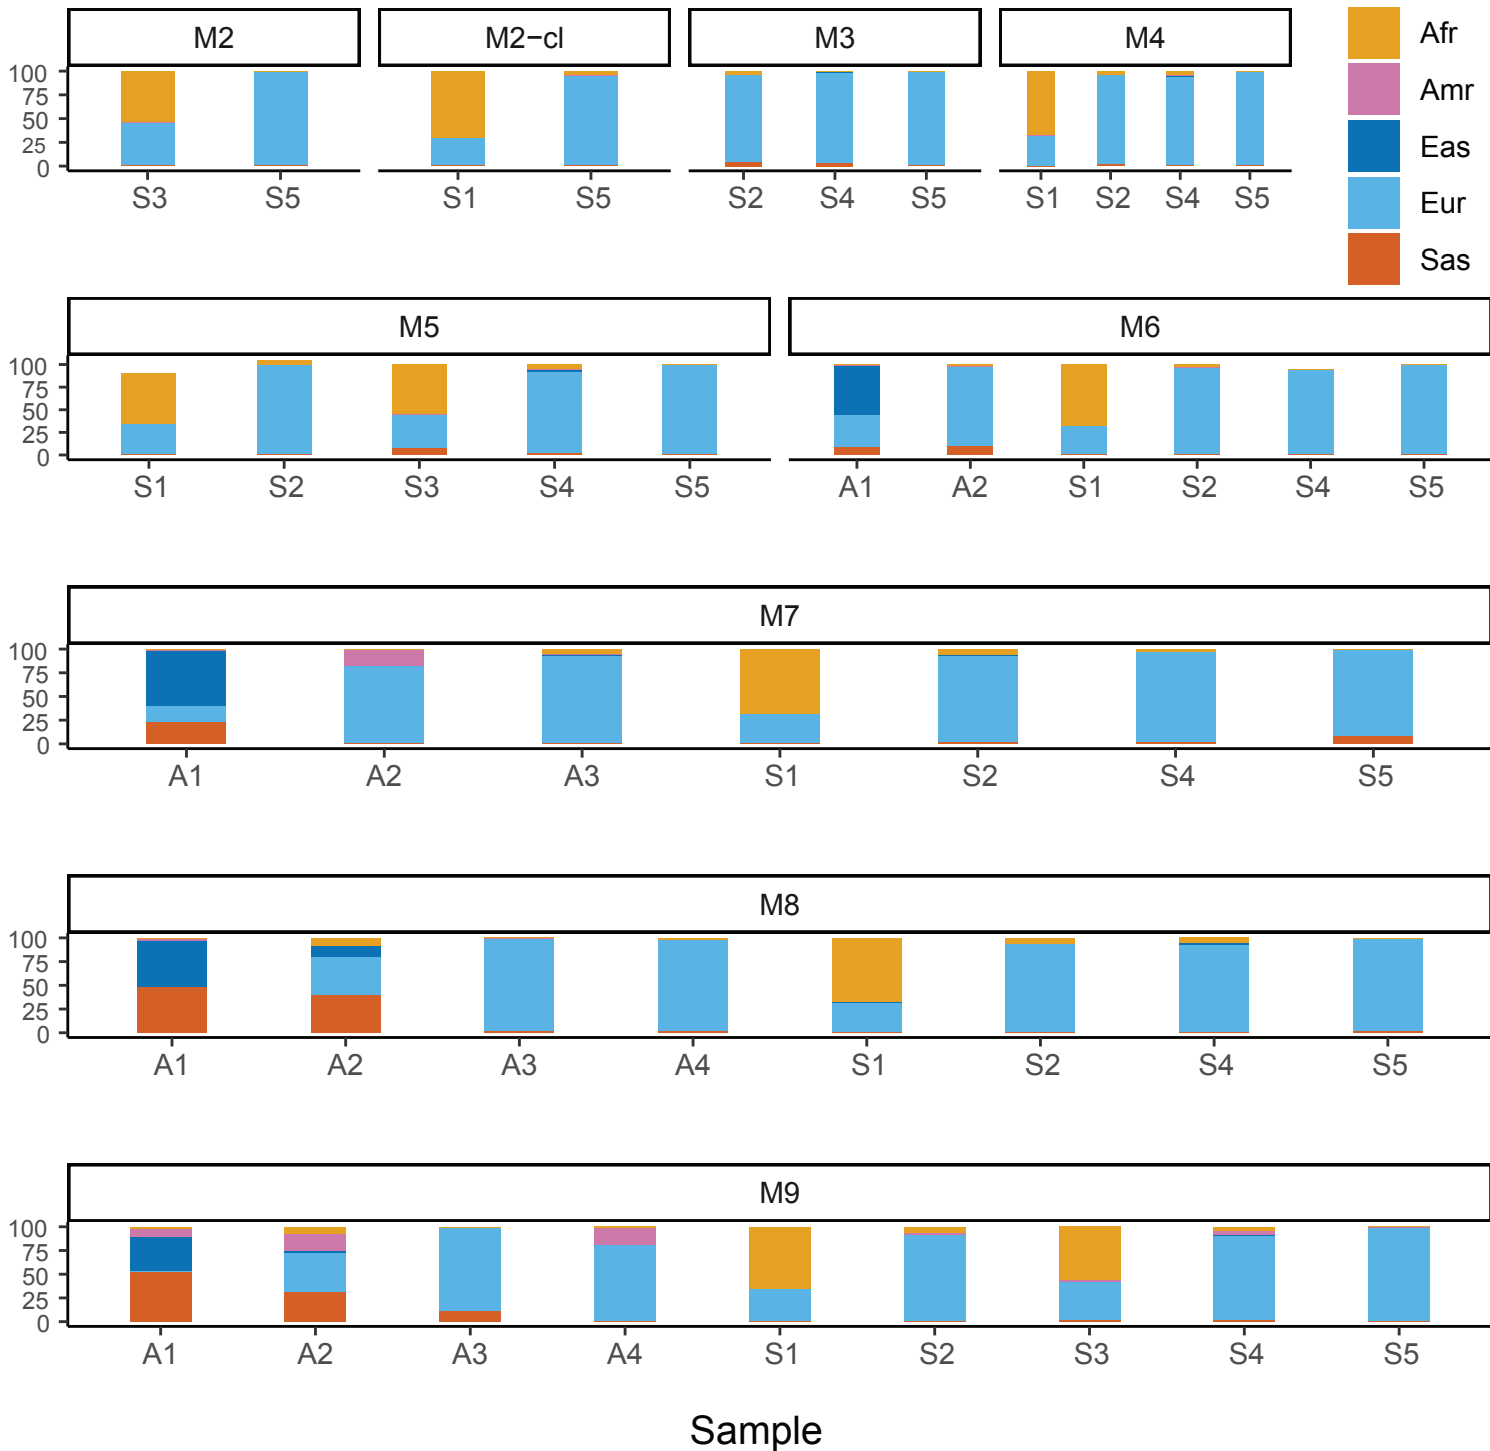

Each cluster was assessed separately with the available SNPs and compared to profiles gathered from 1000 Genomes database with known populations. Each panel represents a mixture and its clusters with regard to similarity of the profiles towards the assessed populations. The ancestry determination is stable between the different mixtures with the exception of datasets with complex ancestry (A1 and A2 datasets).

**Supplementary figure 5: UMAP and K-means clustering of in silico mixtures in the first iteration using mtDNA SNPs.**

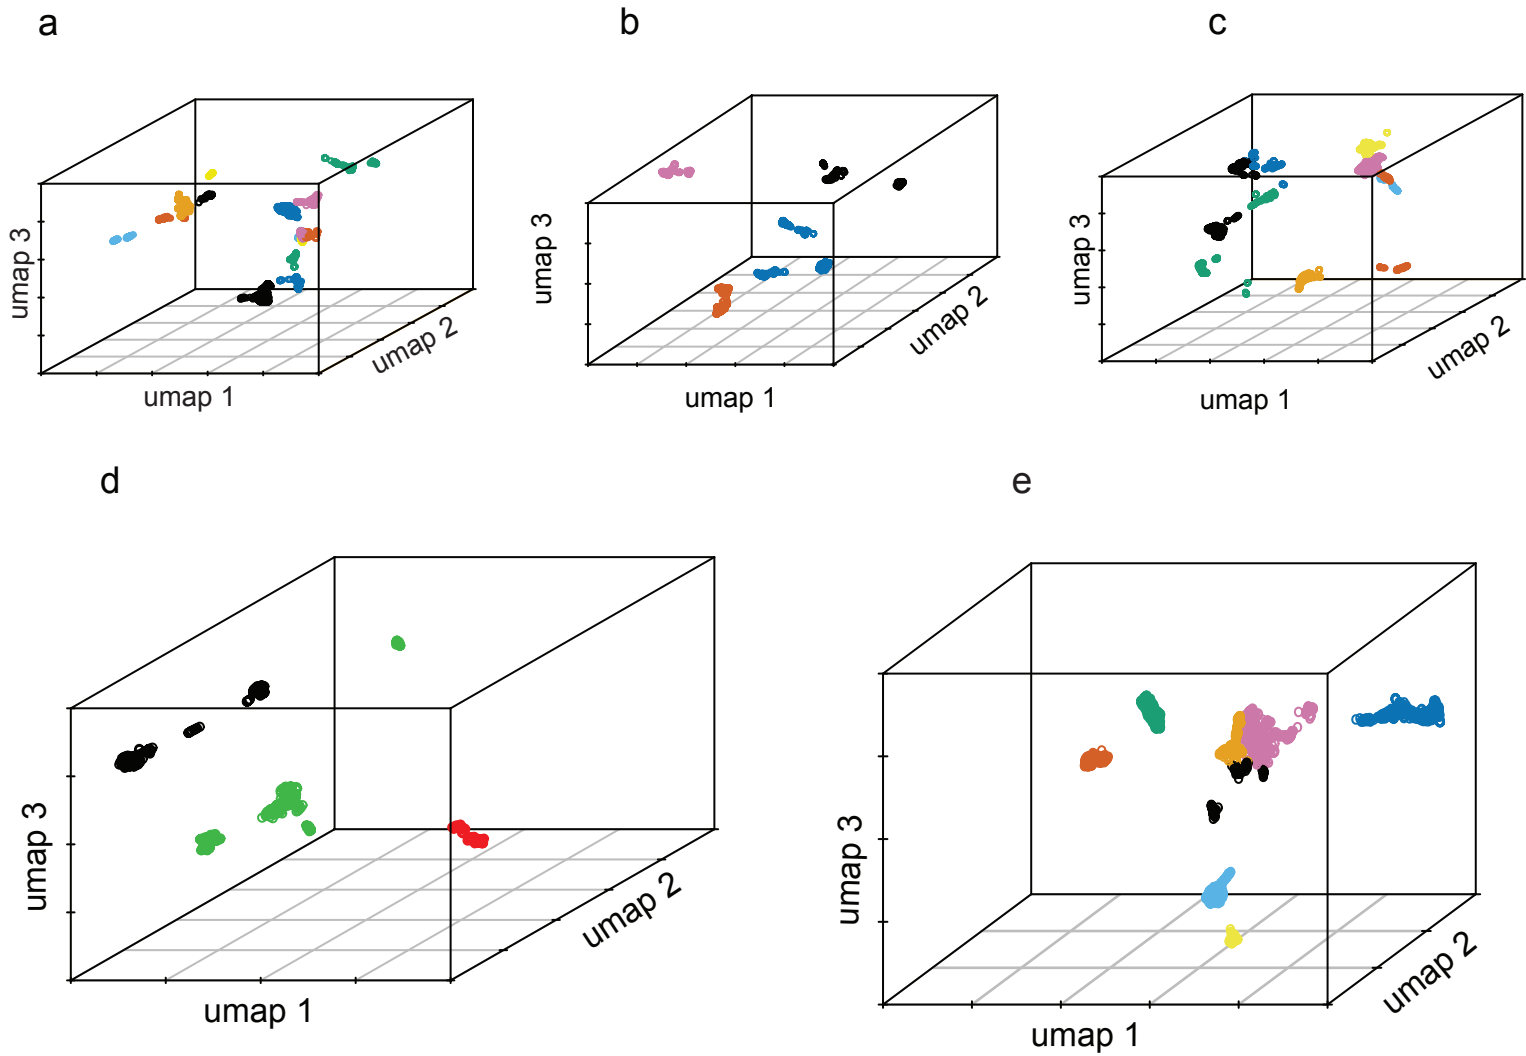

**a)** Mixture of 5 individuals, in the first iteration the clustering remained fairly unclear. **b)** Mixture of 6 individuals. NbClust detected a lower number of cluster with very unclear clustering result. **c)** Mixture of 7 individuals. NbClust detected 8 cluster with unclear borders. **d)** Mixture of 8 individuals NbClust detected a lower number of individual cluster. **e)** Mixture of 9 individuals. NbClust detected 8 clusters while some clusters appear clean and well separated, others cluster close together with little to separate them

**Supplementary figure 6: Number of matching and non-matching identity SNPs**

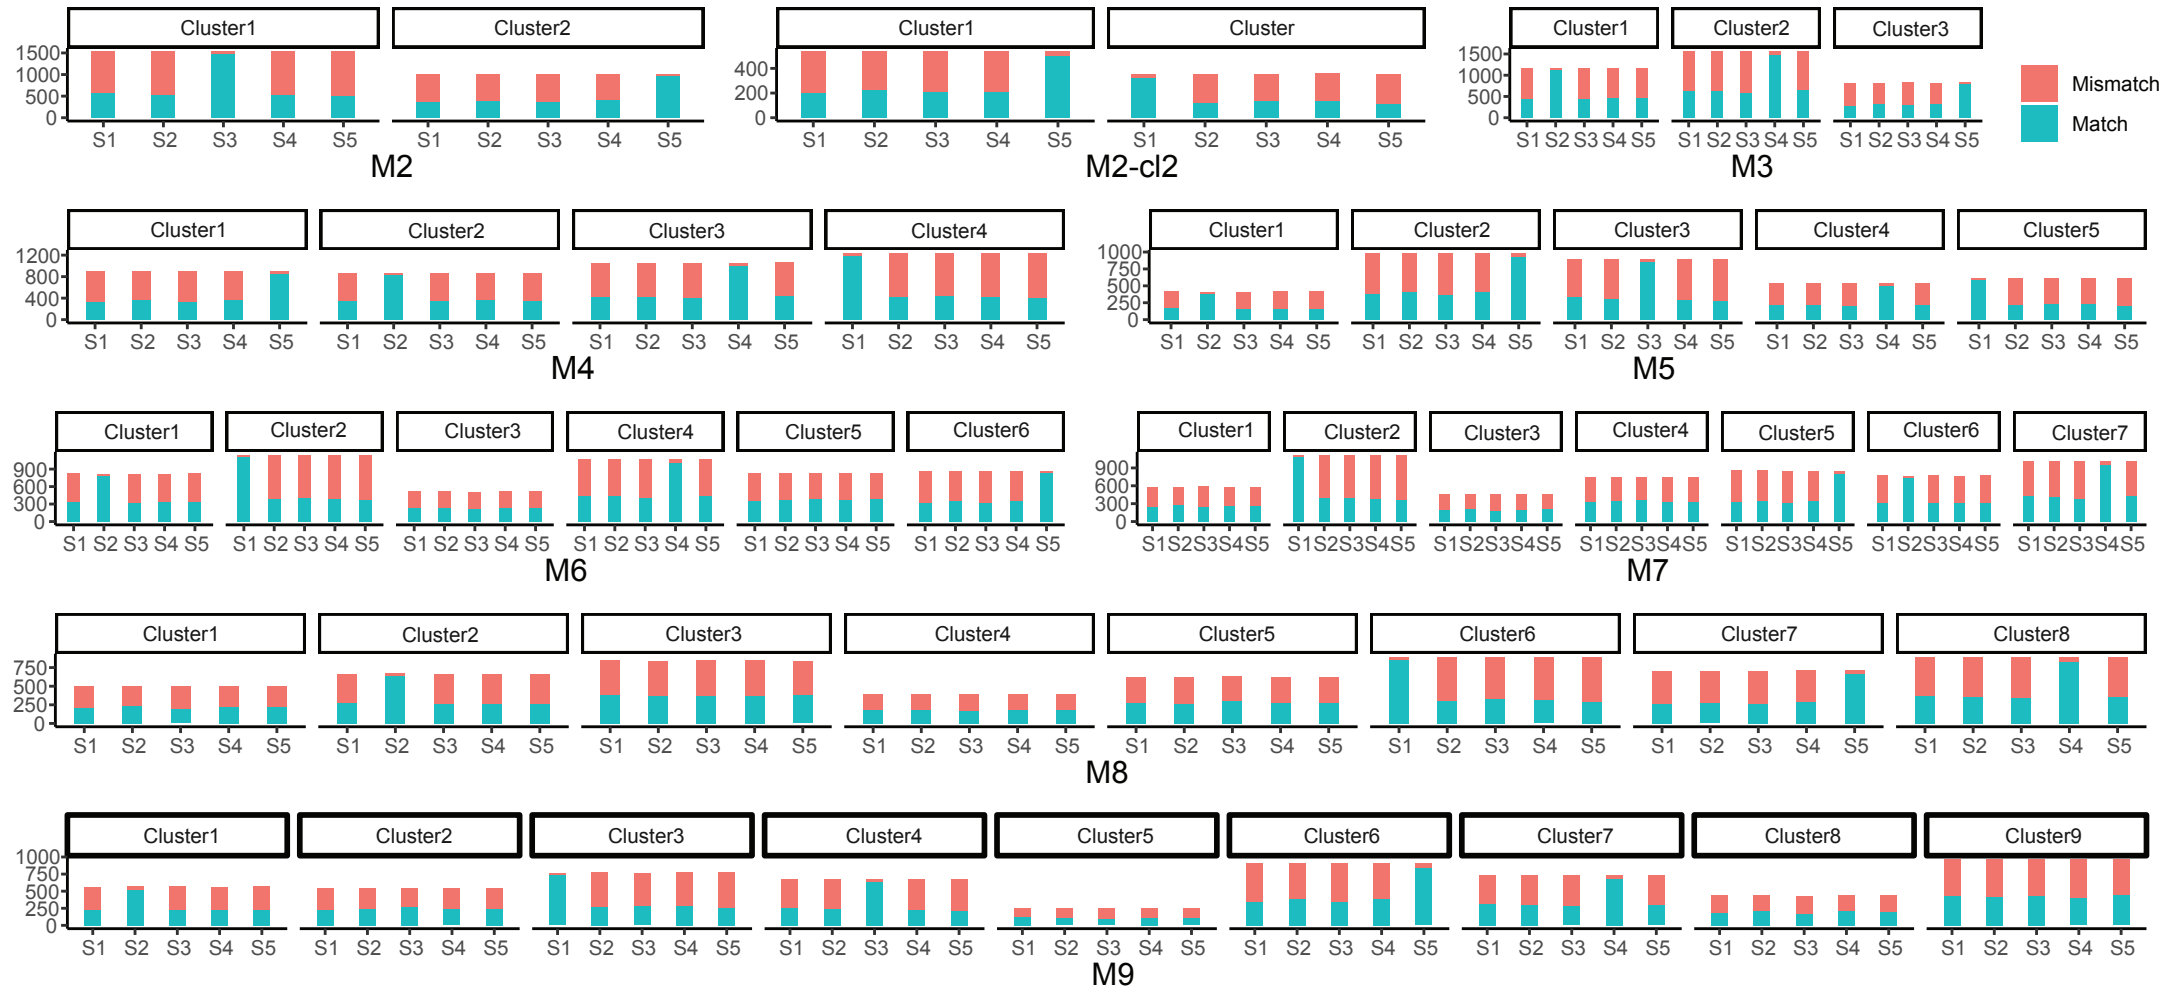

The comparison is made between the list of available SNPs per cluster in each deconvoluted mixture (M2-M9) and the whole exome sequencing reference. In each cluster that matches the whole exome sequencing (WES) reference we observe one sample matching with over 90% of the total SNPs while other samples maintain about 40% natural similarity towards to cluster. The number of available SNPs varies between the clusters depending on available SNPs in each cluster that also appears in the WES reference

**Supplementary figure 7:** The analysis of each cluster of the 4 person uneven mixture with 3 minor clusters.

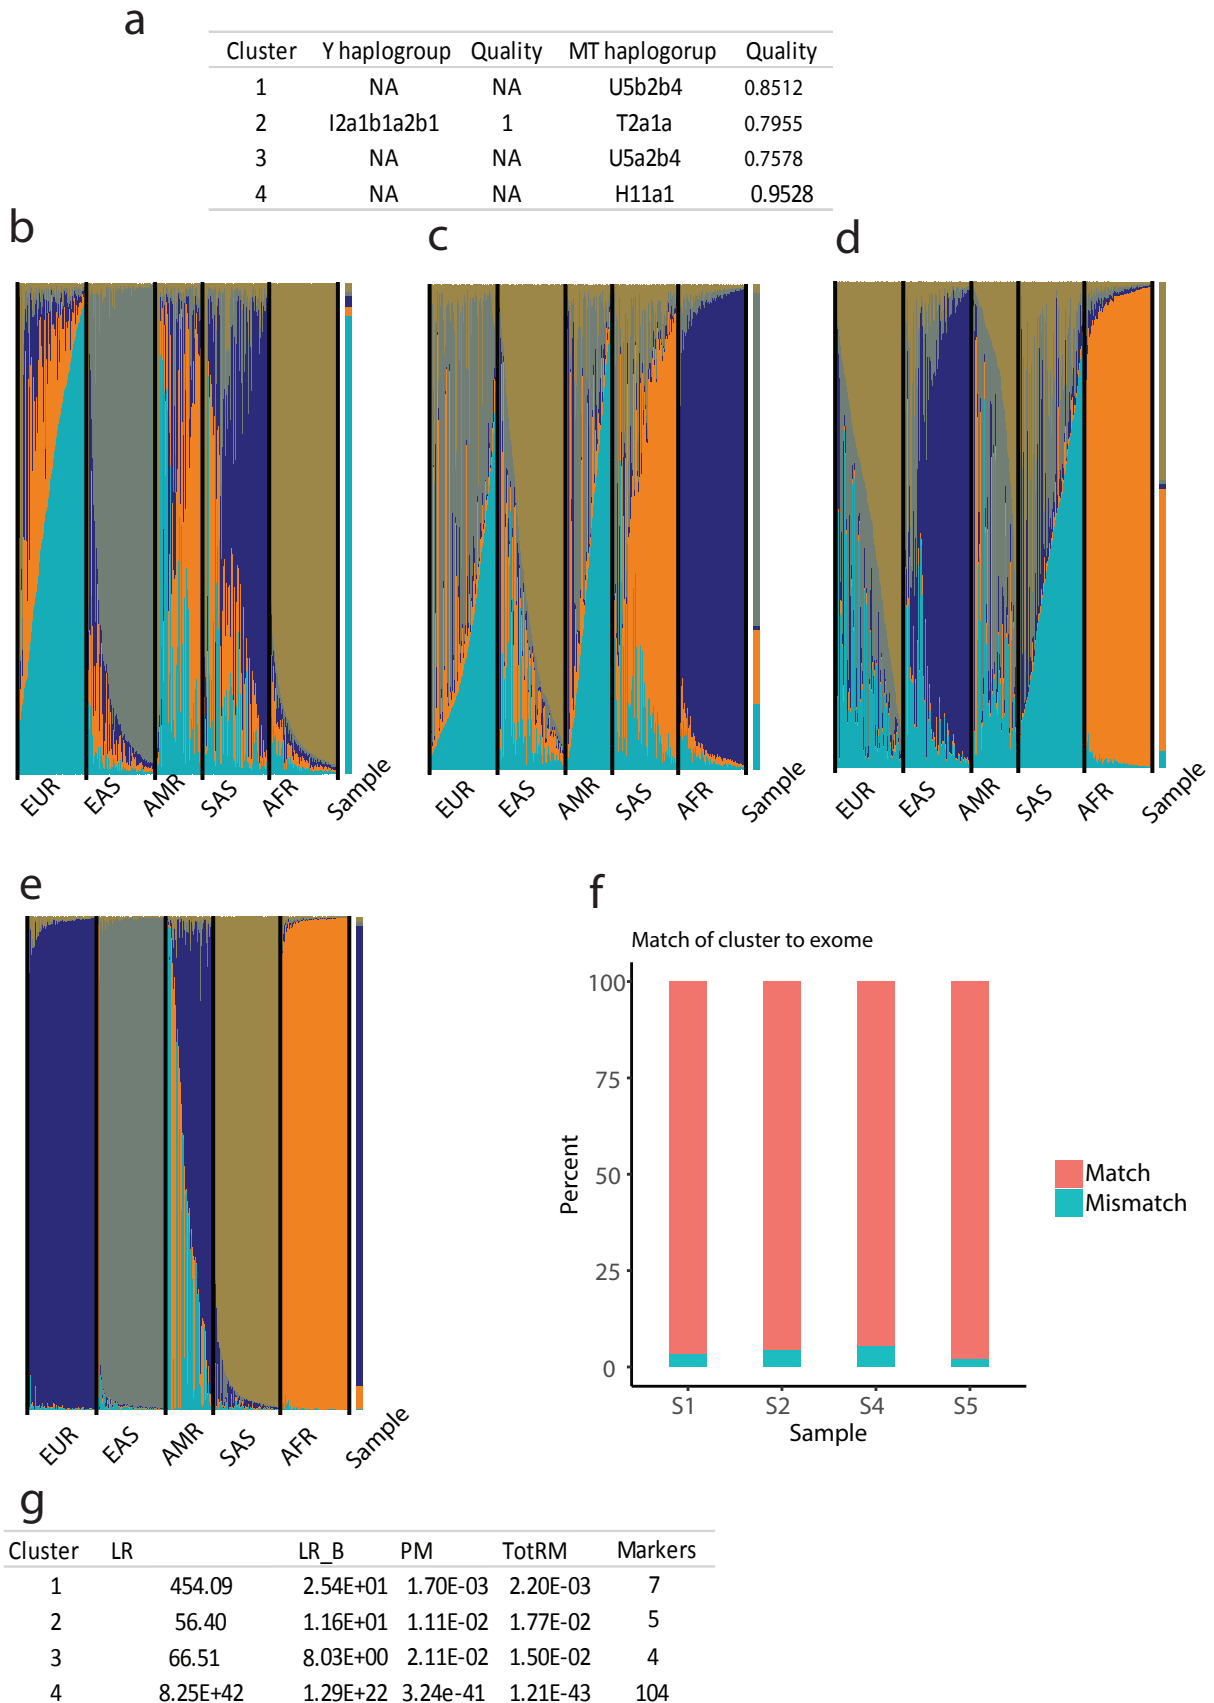

**a)** Results of Y chromosome (Yleaf) and mtDNA haplogroup assignment (Haplogrep). The three minor clusters (1-3) present relatively low confidence in the assigned haplogroup compared to the major cluster (4). One of the minor clusters is also missing a Y haplogroup. **b)** biparental ancestry of the minor cluster 1 in comparison to the ancestry prediction of samples with known ancestry (1000 Genomes). The prediction is correctly pointing towards European ancestry; however, the overall prediction of samples with known ancestry is unstable. We observe the same phenomena with minor cluster 2 (**c**) and minor cluster 3 (**d**). At the same time prediction for the major cluster 4 (**e**) is stable across the populations. **f)** Percentage match towards the correct exome sample for each cluster. Even with lower number of cells the matching ability stays stable. **g)** Calculation of LR and other forensic parameters. The limited number of markers in the minor clusters (1-3) provides only relatively low LR and PM compared to the major component cluster 4. The used depth per SNP is 20.

**Supplementary figure 8: The analysis of each cluster of the 4 person uneven mixture with 1 minor cluster**

**a**

| Cluster | Y haplogroup | Quality | MT haplogroup | Quality |
|---------|--------------|---------|---------------|---------|
| 1       | NA           |         | H11a1         | 0.9528  |
| 2       | I2a1b1a2b1a~ | 1       | T2a1a         | 0.9324  |
| 3       | NA           |         | U5b2b4a       | 0.9824  |
| 4       | E1b1a1a1     | 1       | U5a2          | 0.824   |

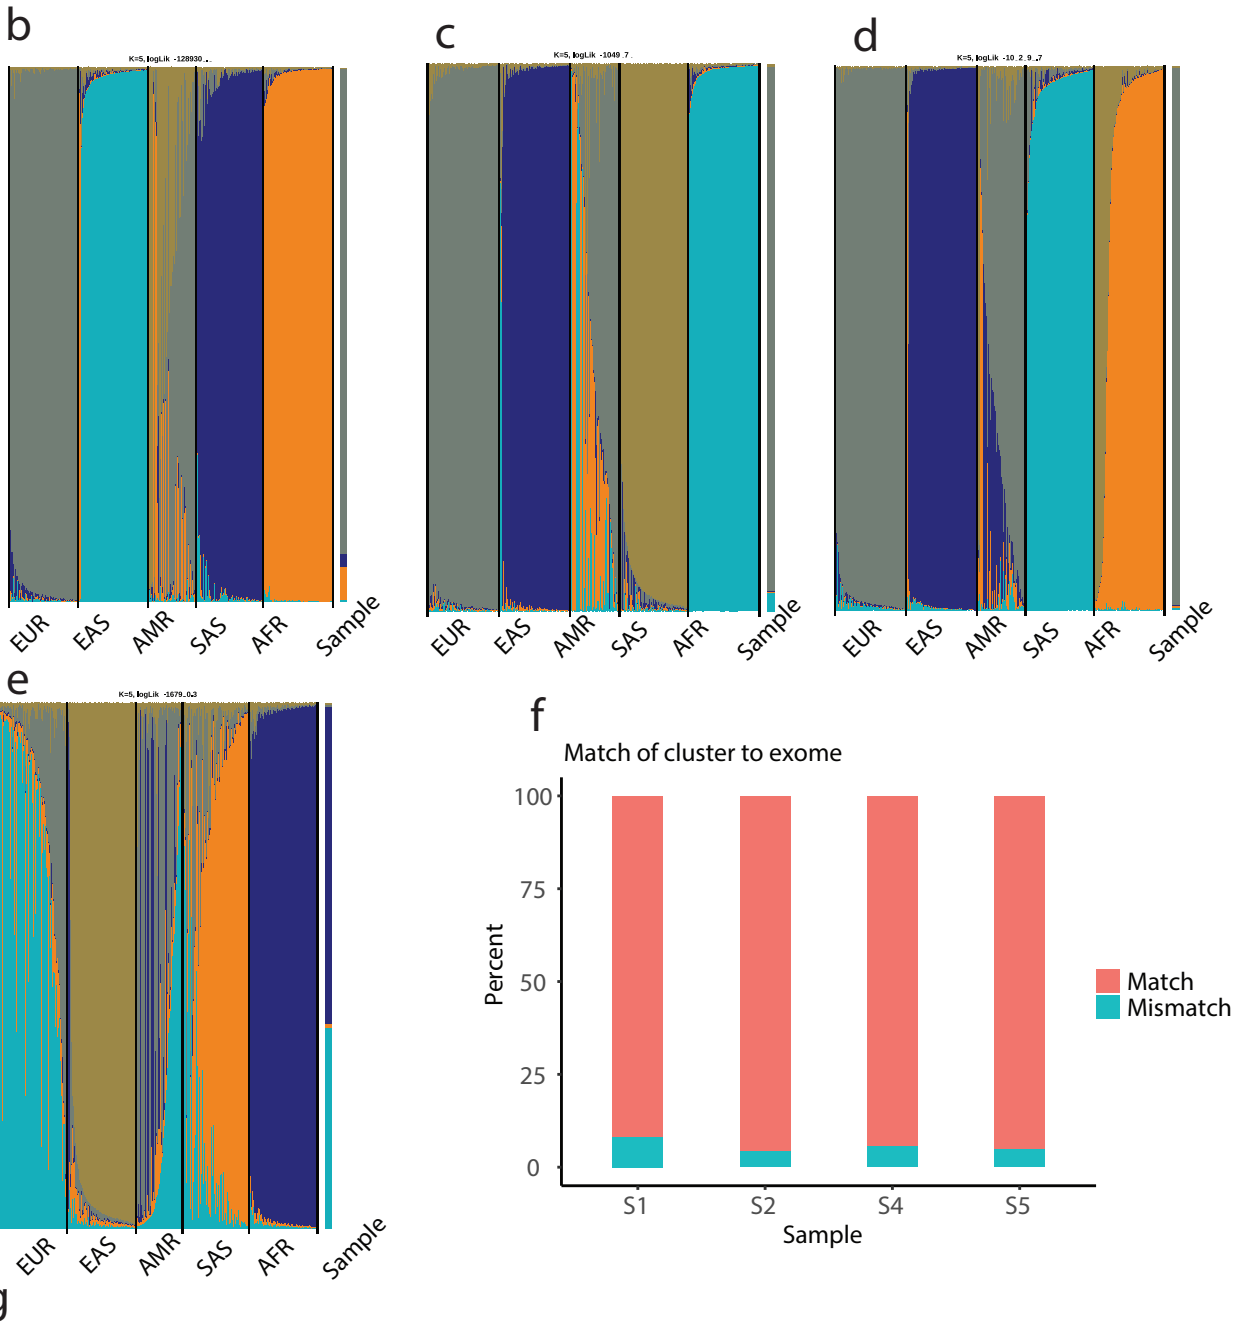

**a)** Results of Y chromosome (Yleaf) and mtDNA haplogroup assignment (Haplogrep). The three major clusters (1-3) present high prediction confidence in the assigned haplogroup compared to the minor cluster (4). **b-d)** biparental ancestry of the major clusters 1-3 in comparison to the ancestry prediction of samples with known ancestry (1000 Genomes). The prediction is stable in between the populations as well as for the samples. **e)** biparental ancestry prediction of the minor cluster 4. The prediction of the sample correctly assigns mixed African and European ancestries. However, the overall stability of the prediction for the minor cluster is less reliable for the reference 1000 Genomes samples **f)** percentage match towards the correct exome sample for each cluster. Even with lower number of cells the matching ability stays stable. **g)** calculation of LR and other forensic parameters. The limited number of markers in the minor cluster (4) provides only relatively low LR and PM compared to the major component clusters 1-3. The used depth per SNP is 20.



**Supplementary figure 9:** Concordance of the separation of individuals for in silico mixture of 2 and in silico mixture of 9 individuals (previously used in the manuscript).

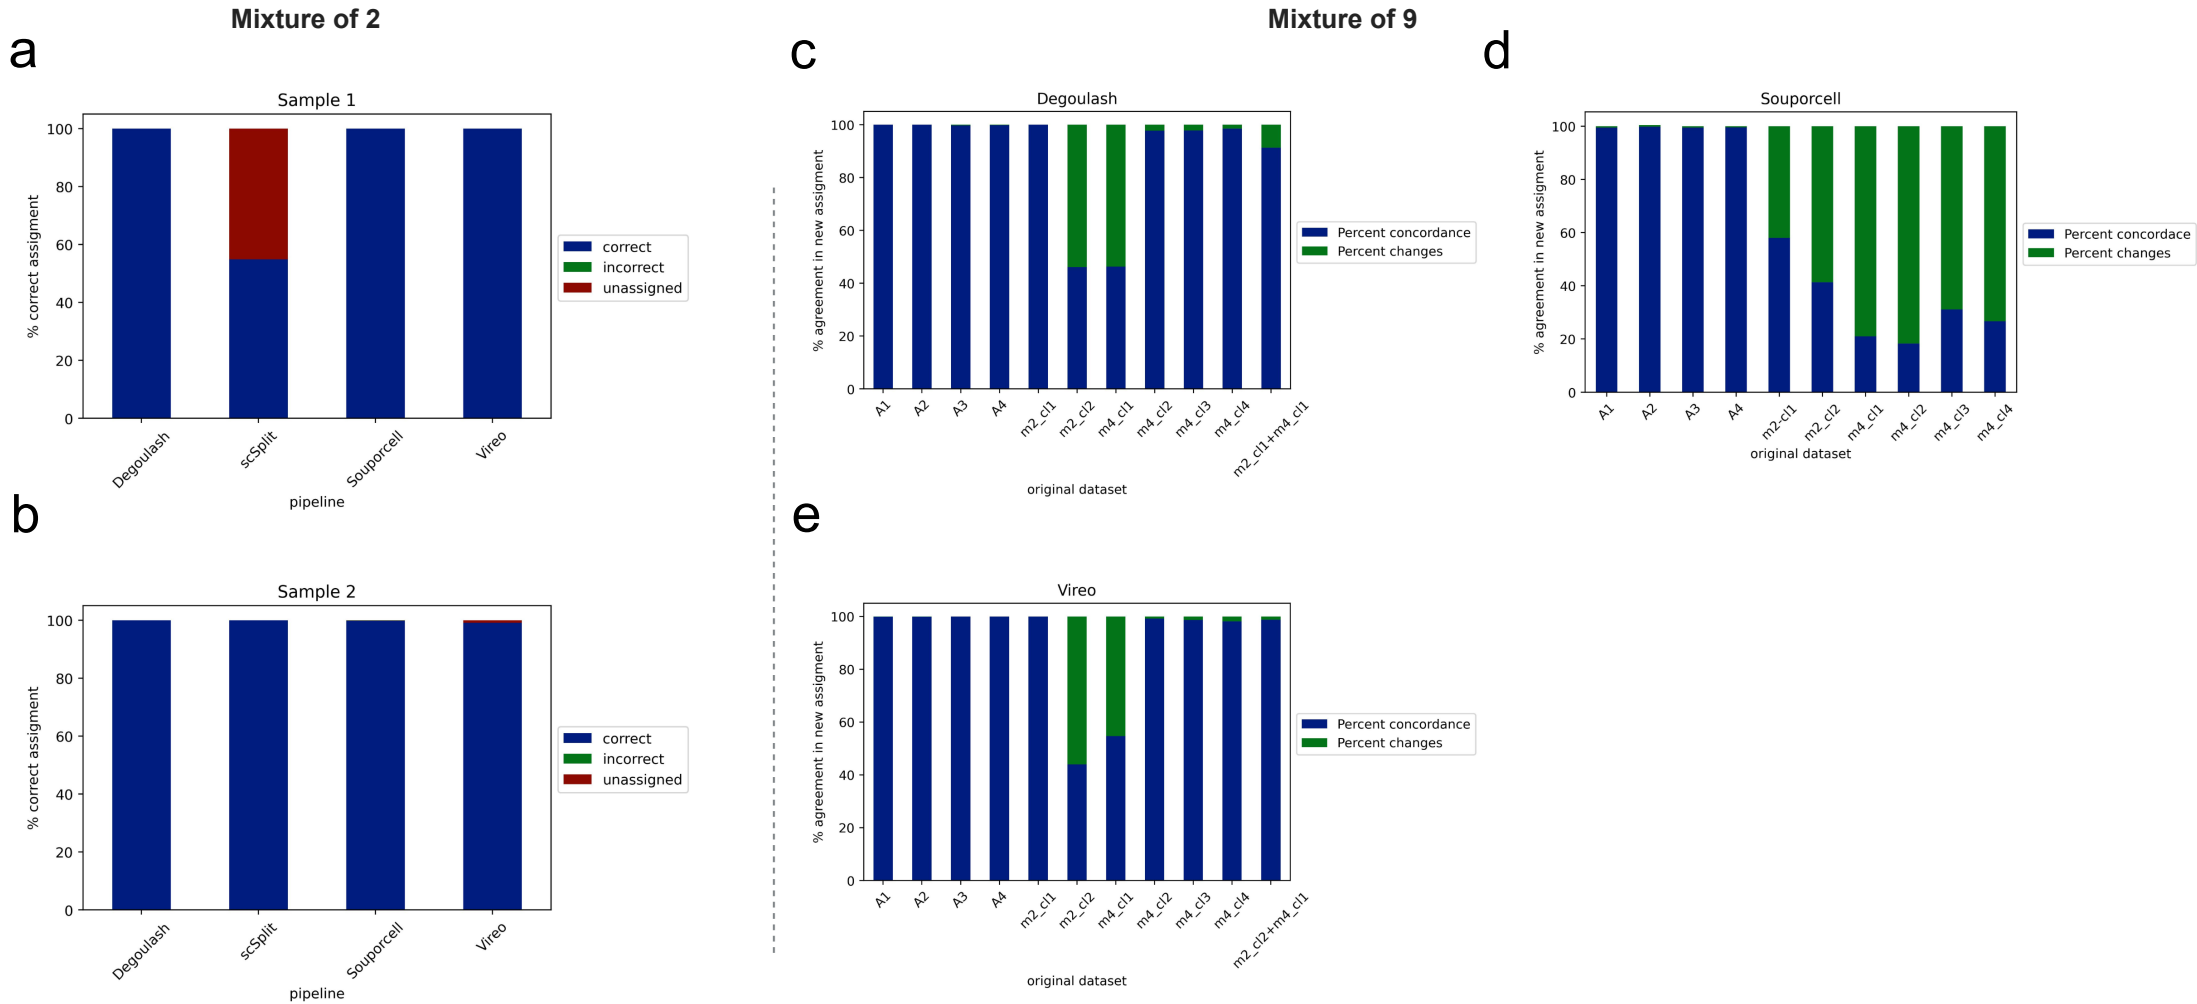

**a)** Results between the four pipelines (Degoulash, ScSplit, SoupOrCell, Vireo) for donor 1 (of 2) in mixture of 2 individuals. **b)** Results between the four pipelines (Degoulash, ScSplit, SoupOrCell, Vireo) for donor 2 (of 2) in mixture of 2 individuals. Since for mixture 2 we mixed 2 single source datasets we can determine the correct assignment of each cell reported in a and b. **c)** concordance results for mixture of 9 using the Degoulash pipeline. **d)** Concordance results for mixture of 9 using the SouOrCell pipeline. **e)** Concordance results for mixture of 9 using the Vireo pipeline. The mixture of 9 uses 4 single source datasets (A1-A4) and 2 biological mixture datasets (M2 and M4, mixtures of 2 and 4, respectively, with one shared individual between the clusters – M2-cluster2 and M4-cluster1). Therefore, we can determine the correct assignment for A1-A4 datasets. For clusters resulting from M2 and M4 we determine changes from the previous assignment (as reported in the manuscript and confirmed via the analysis pipeline and comparison with single source whole exome sequencing reference). ScSplit results are not reported here due to failure to finish citing insufficient memory on the large dataset.

**Supplementary figure 10:** The comparison of time and maximal RAM used during the run of various deconvolution pipelines.

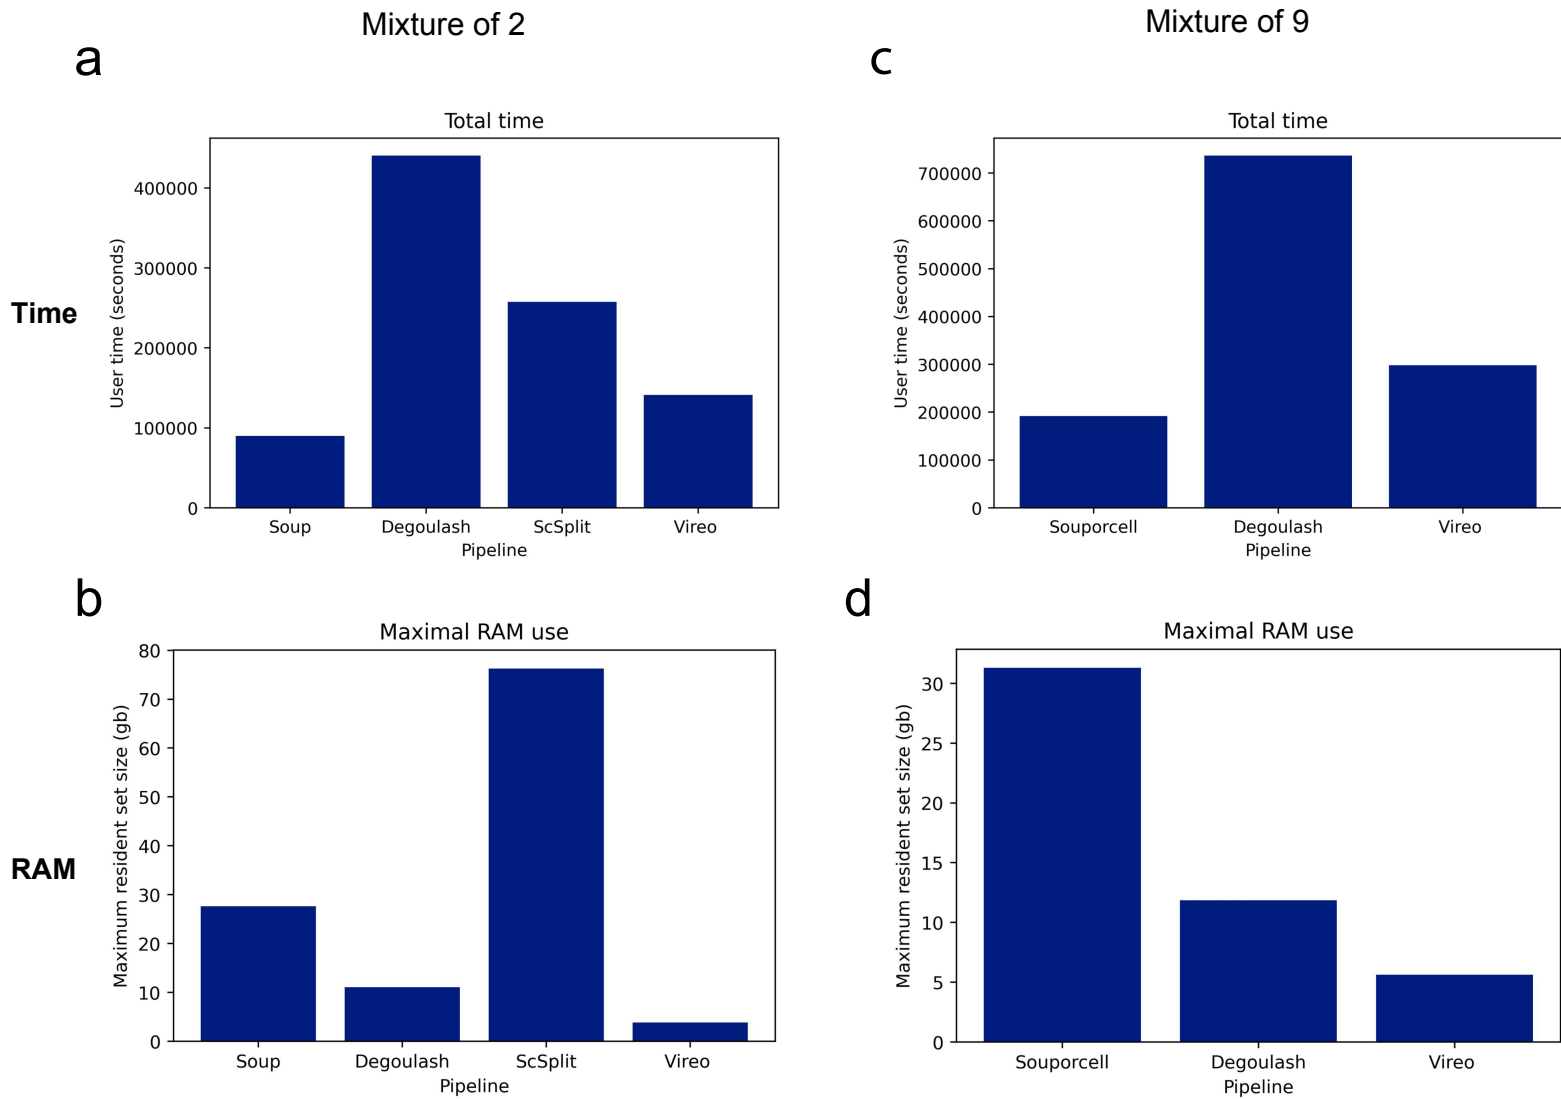

The mixtures used are a mixture of 2 individuals and a mixture of 9 individuals previously used in the manuscript. Due to some of the pipelines (Vireo, SoupOrCell) not supporting discovery mode (unknown number of contributing individuals) all pipelines were run with set number of individuals. This improved accuracy of Degoulash reported for the mixture of 9 in the manuscript. **a)** user time required for each pipeline with a in silico mixture of 2 individuals between SoupOrCell (Soup), Degoulash, ScSplit, and Vireo. **b)** The maximal resident set size in GB between the four pipelines for in silico mixture of 2 individuals. **c)** user time required for each pipeline for in silico mixture of 9 for SoupOrCell (Soup), Degoulash, and Vireo. ScSplit was not able to finish citing insufficient memory. **d)** The maximal resident set size in GB between the three pipelines for in silico mixture of 9 individuals. In a and b for scSplit the preprocessing of the dataset was added to the pipeline itself, for Vireo the preprocessing step using cellSNP is also added. This was done to provide the same starting point for each pipeline (bam file and barcode file).

**Supplementary table 1. Separation of cells per mixture dataset in both iterations**

| Dataset | Iteration | SNPs | Cells | % of total cells |
|---------|-----------|------|-------|------------------|
| M2      | Iter 1    | 62   | 2286  | 21.3             |
|         | Iter 2    | 630  | 10393 | 97.0             |
| M2-cl   | Iter 1    | 13   | 647   | 7.5              |
|         | Iter 2    | 256  | 6567  | 76.0             |
| M3      | Iter 1    | 59   | 4312  | 70.5             |
|         | Iter 2    | 475  | 5900  | 96.5             |
| M4      | Iter 1    | 67   | 5268  | 84.1             |
|         | Iter 2    | 1935 | 6118  | 97.6             |
| M5      | Iter 1    | 73   | 3508  | 43.9             |
|         | Iter 2    | 1107 | 7836  | 97.6             |
| M6      | Iter 1    | 49   | 1501  | 15.0             |
|         | Iter 2    | 1255 | 9245  | 92.5             |
| M7      | Iter 1    | 56   | 4648  | 46.5             |
|         | Iter 2    | 4486 | 9889  | 98.9             |
| M8      | Iter 1    | 42   | 724   | 7.2              |
|         | Iter 2    | 1253 | 9728  | 97.3             |
| M9      | Iter 1    | 51   | 3407  | 34.1             |
|         | Iter 2    | 1773 | 9817  | 98.2             |

**Supplementary table 2. *In silico* mixture generation with regard to the dataset of origin and individual contribution in each mixture**

| ID                   | M5   | M6   | M7   | M8   | M9   |   |
|----------------------|------|------|------|------|------|---|
| N individuals        | 5    | 6    | 7    | 8    | 9    |   |
| Dataset used         | M2   | X    |      |      | X    |   |
|                      | M4   | X    | X    | X    | X    |   |
|                      | A1   |      | X    | X    | X    |   |
|                      | A2   |      |      |      | X    | X |
|                      | A3   |      |      | X    | X    | X |
|                      | A4   |      | X    | X    | X    | X |
| Cells per individual | 1600 | 1667 | 1429 | 1250 | 1000 |   |

Notes: M2 and M4 are biological mixtures of 2 and 4 individuals respectively. The mixtures share one individual between them (S5). A1-A4 are publically available single source datasets. M5 was made with 5000 cells from M2 and 3000 cells from M4 to correct on difference between the mixtures regarding ratios and reads per cell.

**Supplementary table 3. Y chromosome and mtDNA haplogroup assignment reference WES sequencing (S1-S5) and publicly available single-origin sc-RNA datasets**

| Sample | Y haplogroup | QC score | MT haplo | QC score |
|--------|--------------|----------|----------|----------|
| S1     | E1b1a1a1     | 1        | NA       | NA       |
| S2     | NA           | 0        | NA       | NA       |
| S3     | E1b1b1b2a1a1 | 1        | NA       | NA       |
| S4     | NA           | NA       | NA       | NA       |
| S5     | NA           | NA       | NA       | NA       |
|        | R1b1a1b1a1a2 |          |          |          |
| A2     | b            | 0.956    | V1a1a1   | 0.95     |
| A3     | R1b1a1b      | 0.978    | K1a4a1   | 0.96     |
| A4     | Q2a1a        | 0.964    | X2c1a    | 1        |
| A1     | NA           | Na       | E1a1a1   | 0.97     |

**Supplementary table 4. Biparental ancestry determination towards the major population determined by 1000 Genomes for the reference WES sequencing (S1-S5) and publicly available single-origin scRNA-seq datasets (A1-A4)**

| Sample | Eur   | Sas   | Amr   | Eas   | Afr   |
|--------|-------|-------|-------|-------|-------|
| S1     | 0.299 | 0.015 | 0.003 | 0.01  | 0.673 |
| S2     | 0.914 | 0.039 | 0.014 | 0.01  | 0.023 |
| S3     | 0.342 | 0.021 | 0.029 | 0.056 | 0.557 |
| S4     | 0.961 | 0.006 | 0.009 | 0.012 | 0.012 |
| S5     | 0.953 | 0.023 | 0.016 | 0.005 | 0.002 |
| A2     | 0.485 | 0.115 | 0.132 | 0.112 | 0.156 |
| A3     | 0.685 | 0.061 | 0.023 | 0.121 | 0.111 |
| A4     | 0.571 | 0.069 | 0.082 | 0.142 | 0.135 |
| A1     | 0.092 | 0.71  | 0.023 | 0.085 | 0.09  |

**Supplementary table 5. Reference whole exome sequencing description in terms of quality, depth, and composition of each sample**

| Sample | Raw      |               | Duplicate  |              | On-target bases | Mean coverage | Mean |      |      |      |      |      |      |      |      |      | 100  |
|--------|----------|---------------|------------|--------------|-----------------|---------------|------|------|------|------|------|------|------|------|------|------|------|
|        | reads    | Aligned reads | percentage | Usable reads |                 |               | 1x   | 5x   | 10x  | 15x  | 20x  | 25x  | 30x  | 35x  | 40x  | 50x  | x    |
| S1     | 33292862 | 33197548      | 0.163412   | 27772670     | 2751122930      | 59.06         | 99.7 | 99.1 | 97.3 | 93.9 | 88.7 | 82.1 | 74.8 | 67.4 | 60.1 | 47   | 13.4 |
| S2     | 50421126 | 50279374      | 0.170668   | 41698293     | 4082511474      | 87.64         | 99.8 | 98.8 | 96   | 91.5 | 86.1 | 80.4 | 74.8 | 69.5 | 64.7 | 56.2 | 30.5 |
| S3     | 35615738 | 35517096      | 0.167061   | 29583574     | 2927585500      | 62.85         | 99.7 | 98.8 | 95.9 | 91.2 | 85.2 | 78.7 | 72   | 65.6 | 59.5 | 48.6 | 17.1 |
| S4     | 28621266 | 28462198      | 0.167976   | 23681231     | 2101159799      | 45.1          | 99.5 | 98.4 | 94.8 | 88.5 | 80.2 | 71.1 | 62   | 53.5 | 45.8 | 32.8 | 6.2  |
| S5     | 60872222 | 60690152      | 0.184995   | 49462777     | 4822816371      | 103.53        | 99.6 | 99.3 | 98.6 | 97.2 | 94.8 | 91.6 | 87.7 | 83.4 | 78.8 | 69.8 | 37   |

**Supplementary table 5 continued. Reference whole exome sequencing description in terms of quality, depth, and composition of each sample**

| Sample | FreeMix | RawVariants | RawNovels | RawcompRatedbSNP | RawTiTv | RawHetHom | Yield         | Unaligned | Duplicates   | OffTarget   | Output      |
|--------|---------|-------------|-----------|------------------|---------|-----------|---------------|-----------|--------------|-------------|-------------|
| S1     | 0.00536 | 50711       | 6579      | 87.03            | 2.45    | 2.85      | 4.9939<br>293 | 0.0142971 | 0.8137316571 | 1.414777613 | 2.75112293  |
| S2     | 0.00578 | 45284       | 6776      | 85.04            | 2.32    | 2.15      | 7.5631<br>689 | 0.0212628 | 1.28716203   | 2.172232596 | 4.082511474 |
| S3     | 0.0041  | 49037       | 6962      | 85.8             | 2.47    | 2.35      | 5.3423<br>607 | 0.0147963 | 0.8900282362 | 1.509950664 | 2.9275855   |
| S4     | 0.00672 | 50882       | 12396     | 75.64            | 2.02    | 2.58      | 4.2931<br>899 | 0.0238602 | 0.7171449257 | 1.451024975 | 2.101159799 |
| S5     | 0.00442 | 42399       | 3513      | 91.71            | 2.57    | 1.95      | 9.1308<br>333 | 0.0273105 | 1.6841062    | 2.596600229 | 4.822816371 |

**Supplementary table 6. Uneven mixture cell composition**

| Mixture | A2  | A4  |
|---------|-----|-----|
| 1:9     | 100 | 900 |
| 1:20    | 50  | 950 |
| 1:40    | 25  | 975 |
| 1:60    | 17  | 983 |
| 1:80    | 13  | 987 |
| 1:90    | 10  | 990 |



**Supplementary table 7. Comparison of the uneven mixture deconvolution to the datasets of origin**

| Dataset | Cluster | Correct | Incorrect | Separated cells |
|---------|---------|---------|-----------|-----------------|
|         | 1       | 100     | 0         |                 |
| 1:10    | 2       | 881     | 0         | 981             |
|         | 1       | 50      | 0         |                 |
| 1:20    | 2       | 927     | 0         | 971             |
|         | 1       | 956     | 0         |                 |
| 1:40    | 2       | 25      | 0         | 981             |
|         | 1       | 16      | 0         |                 |
| 1:60    | 2       | 903     | 0         | 956             |
|         | 1       | 0       | 15        |                 |
| 1:80    | 2       | 941     | 13        | 980             |
|         | 1       | 65      | 0         |                 |
|         | 2       | 73      | 1         |                 |
|         | 3       | 76      | 1         |                 |
| 1 major | 4       | 1971    | 42        | 2187            |
|         | 1       | 1978    | 38        |                 |
|         | 2       | 1217    | 6         |                 |
|         | 3       | 1307    | 5         |                 |
| 3 major | 4       | 152     | 3         | 4656            |

**Supplementary table 8. Uniparental ancestry, biparental ancestry and forensic parameters for the minor components of uneven mixtures of higher degree**

| Cluster    | Cells | Y haplogroup | Y Qual | MT     | MT QUAL | Structure | match | LR       | LR_B     | PM       | TotRM    | Power of exclusion | Power of discrimination | markers |
|------------|-------|--------------|--------|--------|---------|-----------|-------|----------|----------|----------|----------|--------------------|-------------------------|---------|
| 1 minor    | 152   | E1b1a1a1     | 0.96   | R      | 0.8676  | Afr+Eur   | 0.885 | 6.87E+08 | 8.02E+04 | 3.02E-10 | 1.46E-09 | 1                  | 1                       | 24      |
| 3 minor -1 | 66    | NA           | NA     | U5b2b4 | 0.9622  | Eur+Sas   | 0.958 | 2.14E+04 | 2.2E+02  | 1.57E-05 | 4.67E-05 | 0.993238           | 0.999984                | 12      |
| 3 minor -2 | 76    | I2a1b1a2b1   | 1      | T2a1a  | 0.8212  | Eur       | 0.933 | 1.26E+03 | 6.39E+01 | 2.56E-04 | 7.96E-04 | 0.976419           | 0.999744                | 9       |
| 3 minor -3 | 73    | E1b1a1a1     | 1      | U5a2b4 | 0.8309  | Eur+Afr   | 0.948 | 2.35E+03 | 4.52E+01 | 1.38E-03 | 4.25E-04 | 0.950701           | 0.998623                | 7       |

**Supplementary table 9. Markers matching towards the exome reference per cluster and number of cells**

| Cluster   | Cells  | Average Match | St.dev. Avr match | Average Markers | St. dev avr.markers |
|-----------|--------|---------------|-------------------|-----------------|---------------------|
| Cluster 1 | 10     | 0.8359        | 0.1524            | 12.40           | 3.8644              |
|           | 20     | 0.9500        | 0.0284            | 28.13           | 3.7961              |
|           | 30     | 0.9564        | 0.0162            | 45.90           | 6.3675              |
|           | 50     | 0.9638        | 0.0168            | 71.40           | 5.1251              |
|           | 100    | 0.9710        | 0.0135            | 139.90          | 11.6471             |
|           | 150    | 0.9665        | 0.0091            | 214.70          | 9.1415              |
|           | 200    | 0.9634        | 0.0101            | 287.80          | 12.2728             |
|           | 300    | 0.9692        | 0.0105            | 447.56          | 20.1997             |
|           | 400    | 0.9633        | 0.0071            | 580.30          | 21.4841             |
|           | 500    | 0.9649        | 0.0066            | 720.30          | 21.6490             |
| Cluster 2 | 10     | 0.9864        | 0.0290            | 11.60           | 4.0607              |
|           | 20     | 0.9658        | 0.0473            | 22.20           | 3.4577              |
|           | 30     | 0.9750        | 0.0265            | 33.30           | 5.3344              |
|           | 50     | 0.9497        | 0.0507            | 58.30           | 9.6154              |
|           | 100    | 0.9529        | 0.0366            | 116.50          | 10.9671             |
|           | 150    | 0.9597        | 0.0134            | 176.50          | 4.6248              |
|           | 200    | 0.9353        | 0.0122            | 272.30          | 9.2502              |
|           | 300    | 0.9489        | 0.0121            | 376.90          | 16.4212             |
| 400       | 0.9433 | 0.0119        | 510.20            | 21.1755         |                     |
| 500       | 0.9466 | 0.0098        | 635.20            | 11.1036         |                     |
| Cluster 3 | 10     | 0.9676        | 0.0438            | 11.50           | 4.5826              |

|           |     |        |        |        |         |
|-----------|-----|--------|--------|--------|---------|
|           | 20  | 0.9481 | 0.0650 | 26.40  | 3.7859  |
|           | 30  | 0.9655 | 0.0320 | 42.30  | 4.1633  |
|           | 50  | 0.9615 | 0.0364 | 66.40  | 4.3589  |
|           | 100 | 0.9566 | 0.0145 | 124.30 | 14.3643 |
|           | 150 | 0.9498 | 0.0160 | 203.70 | 8.5049  |
|           | 200 | 0.9353 | 0.0122 | 272.30 | 11.1355 |
|           | 300 | 0.9262 | 0.0106 | 511.90 | 71.1899 |
|           | 400 | 0.9354 | 0.0131 | 529.40 | 26.3122 |
|           | 500 | 0.9325 | 0.0071 | 644.80 | 21.5948 |
|           | 10  | 0.9250 | 0.0570 | 11.57  | 2.2991  |
|           | 20  | 0.9084 | 0.0747 | 24.86  | 5.3675  |
|           | 30  | 0.9037 | 0.0489 | 37.00  | 4.4721  |
|           | 50  | 0.9180 | 0.0370 | 55.14  | 3.9340  |
|           | 100 | 0.9219 | 0.0245 | 102.14 | 1.6762  |
|           | 150 | 0.9230 | 0.0179 | 149.14 | 9.9067  |
|           | 200 | 0.9210 | 0.0122 | 205.71 | 9.4112  |
|           | 300 | 0.9214 | 0.0132 | 307.00 | 11.2398 |
|           | 400 | 0.9241 | 0.0067 | 432.29 | 14.6937 |
| Cluster 4 | 500 | 0.9221 | 0.0077 | 533.43 | 9.0895  |
