# Supplementary material for: Single-cell transcriptome sequencing allows genetic separation, characterization and identification of individuals in multi-person biological mixtures
Source: PubMed Central journal article supplement (PMC9941516; doi:10.1038/s42003-023-04557-z), 2023-02-20
Supplement: 42003_2023_4557_MOESM2_ESM.pdf [file 42003_2023_4557_MOESM2_ESM.pdf]

## Description of Additional Supplementary Files

**File name:** Supplementary Data 1

**Description:** Summary of sequencing quality and depth per dataset.

**File name:** Supplementary Data 2

**Description:** Percentage of reads aligned to Y chromosome per assigned cluster in each dataset.

**File name:** Supplementary Data 3

**Description:** Percentage of reads on X chromosome and in the XIST gene compared to the Yleaf results per assigned cluster in each dataset.

**File name:** Supplementary Data 4

**Description:** Paternal and Maternal ancestry prediction after mixture deconvolution comparison to the available reference data.

**File name:** Supplementary Data 5

**Description:** Biparental ancestry assessment in each cluster of the deconvoluted mixtures towards five major populations assigned by 1000 Genomes.

**File name:** Supplementary Data 6

**Description:** Allele match toward the exome reference per cluster after mixture deconvolution for each deconvoluted mixture.

**File name:** Supplementary Data 7

**Description:** Calculation of forensic parameters per cluster after mixture deconvolution.

**File name:** Supplementary Data 8

**Description:** Calculation of forensic parameters per cluster and number of cells.

**File name:** Supplementary Data 9

**Description:** Determination of Y chromosome haplogroup per number of cell per cluster.

**File name:** Supplementary Data 10

**Description:** Determination of mtDNA haplogroup per cluster and number of cells.
